# Supplementary material
Source: HighWire-hosted journal article supplement (https://bmjopen.bmj.com/content/14/7/e082988)
Supplement: inline-supplementary-material-1 [file inline-supplementary-material-1.pdf]

**Supplementary Table 1. ICD-9 and ICD-10 diagnosis codes for Alzheimer's disease and related dementias (ADRD) / mild cognitive impairment (MCI) and chronic conditions<sup>43</sup>**

| Medical Conditions                               | Code        | Definition                                       |
|--------------------------------------------------|-------------|--------------------------------------------------|
| <b>Mild Cognitive Impairment</b>                 |             |                                                  |
| ICD9                                             | 331.83      | Mild cognitive impairment, so stated             |
| ICD10                                            | G31.84      | Mild cognitive impairment, so stated             |
| <b>Alzheimer's disease and related dementias</b> |             |                                                  |
| <b>Alzheimer's disease</b>                       |             |                                                  |
| ICD9                                             | 331.0       | Alzheimer's disease                              |
| ICD10                                            | G30         | Alzheimer's disease                              |
|                                                  | G30.0       | Alzheimer's disease with early onset             |
|                                                  | G30.1       | Alzheimer's disease with late onset              |
|                                                  | G30.8       | Other Alzheimer's disease                        |
|                                                  | G30.9       | Alzheimer's disease, unspecified                 |
| <b>Vascular dementia</b>                         |             |                                                  |
| ICD9                                             | 290.4       | Vascular dementia                                |
|                                                  | 290.40      | Vascular dementia, uncomplicated                 |
|                                                  | 290.41      | Vascular dementia, with delirium                 |
|                                                  | 290.42      | Vascular dementia, with delusions                |
|                                                  | 290.43      | Vascular dementia, with depressed mood           |
| ICD10                                            | F01         | Vascular dementia                                |
|                                                  | F01.5       | Vascular dementia                                |
|                                                  | F01.50      | Vascular dementia without behavioral disturbance |
|                                                  | F01.51      | Vascular dementia with behavioral disturbance    |
| <b>Lewy Body Dementia</b>                        |             |                                                  |
| ICD9                                             | 331.82      | Dementia with Lewy bodies                        |
| ICD10                                            | G31.83      | Dementia with Lewy bodies                        |
| <b>Frontotemporal Dementia</b>                   |             |                                                  |
| ICD9                                             | 331.1       | Frontotemporal Dementia                          |
|                                                  | 331.11      | Pick's disease                                   |
|                                                  | 331.19      | Other frontotemporal dementia                    |
| ICD10                                            | G31.0       | Frontotemporal Dementia                          |
|                                                  | G31.01      | Pick's disease                                   |
|                                                  | G31.09      | Other frontotemporal dementia                    |
| <b>Mental Health Disorders</b>                   |             |                                                  |
| <b>Anxiety</b>                                   |             |                                                  |
| ICD9                                             | 300.0       | Anxiety states                                   |
|                                                  | 300.00      | Anxiety state, unspecified                       |
|                                                  | 300.02      | Generalized anxiety disorder                     |
| ICD10                                            | F41         | Other Anxiety disorders                          |
|                                                  | F41.0       | Panic disorder [episodic paroxysmal anxiety]     |
|                                                  | F41.1       | Generalized anxiety disorder                     |
|                                                  | F41.8       | Other specified anxiety disorders                |
|                                                  | F41.9       | Anxiety disorder, unspecified                    |
| <b>Major Depressive Disorder</b>                 |             |                                                  |
| ICD9                                             | 296.2       | Major depressive disorder, single episode        |
|                                                  | 296.3       | Major depressive disorder, recurrent             |
| ICD10                                            | F32.0-F32.9 | Major depressive disorder                        |
|                                                  | F32.A       | Depression, unspecified                          |
|                                                  | F33.0-F33.9 | Major depressive disorder, recurrent             |
| <b>Bipolar Disorder</b>                          |             |                                                  |

|                                |                            |                                                                                                |
|--------------------------------|----------------------------|------------------------------------------------------------------------------------------------|
| ICD9                           | 296.0-296.9                | Bipolar disorders                                                                              |
| ICD10                          | F31.0-F31.9                | Bipolar disorders                                                                              |
| <b>Psychotic Disorder</b>      |                            |                                                                                                |
| ICD9                           | 295.0-295.9                | Schizophrenic disorders                                                                        |
|                                | 297.0-297.9                | Delusional disorders                                                                           |
| ICD10                          | F20.0-F20.9                | Schizophrenia                                                                                  |
|                                | F22                        | Delusional disorders                                                                           |
|                                | F23                        | Brief psychotic disorder                                                                       |
|                                | F24                        | Shared psychotic disorder                                                                      |
|                                | F25.0, F25.1, F25.8, F25.9 | Schizoaffective disorders                                                                      |
|                                | F28                        | Other psychotic disorder not due to a substance or known physiological condition               |
|                                | F29                        | Unspecified psychosis not due to a substance or known physiological condition                  |
| <b>Sleep Disorder</b>          |                            |                                                                                                |
| ICD9                           | 307.4                      | Specific disorder of sleep of nonorganic origin                                                |
|                                | 327.0-327.8                | Organic sleep disorders                                                                        |
|                                | 780.5                      | Sleep disturbances                                                                             |
| ICD10                          | G47.0-G47.9                | Sleep disorder                                                                                 |
| <b>Chronic Conditions</b>      |                            |                                                                                                |
| <b>Hypertension</b>            |                            |                                                                                                |
| ICD9                           | 401.0, 401.1, 401.9        | Essential hypertension                                                                         |
|                                | 405.0, 405.1, 405.9        | Secondary hypertension                                                                         |
| ICD10                          | I10                        | Essential (primary) hypertension                                                               |
|                                | I15                        | Secondary hypertension                                                                         |
|                                | I1A                        | Other hypertension                                                                             |
| <b>Cerebrovascular Disease</b> |                            |                                                                                                |
| ICD9                           | 436                        | Acute, but ill-defined, cerebrovascular disease                                                |
|                                | 437.0-437.9                | Other and ill-defined cerebrovascular disease                                                  |
|                                | 438.0-438.9                | Late effects of cerebrovascular disease                                                        |
| ICD10                          | I67.0-I67.9                | Other cerebrovascular diseases                                                                 |
|                                | I68.0, I68.2, I68.8        | Cerebrovascular disorders in diseases classified elsewhere                                     |
|                                | I69.8, I69.9               | Sequelae of cerebrovascular disease                                                            |
| <b>Cerebral infarction</b>     |                            |                                                                                                |
| ICD9                           |                            |                                                                                                |
|                                | 433.01                     | Occlusion and stenosis of basilar artery with cerebral infarction                              |
|                                | 433.11                     | Occlusion and stenosis of carotid artery with cerebral infarction                              |
|                                | 433.21                     | Occlusion and stenosis of vertebral artery with cerebral infarction                            |
|                                | 433.31                     | Occlusion and stenosis of multiple and bilateral precerebral arteries with cerebral infarction |
|                                | 433.81                     | Occlusion and stenosis of other specified precerebral artery with cerebral infarction          |
|                                | 433.91                     | Occlusion and stenosis of unspecified precerebral artery with cerebral infarction              |
|                                | 434.01                     | Cerebral thrombosis with cerebral infarction                                                   |
|                                | 434.11                     | Cerebral embolism with cerebral infarction                                                     |
|                                | 434.91                     | Cerebral artery occlusion, unspecified with cerebral infarction                                |
| ICD10                          | I63.0-I63.9                | Cerebral infarction                                                                            |
| <b>Overweight and Obesity</b>  |                            |                                                                                                |
| ICD9                           | 278.0                      | Overweight and obesity                                                                         |

|                                              |             |                                                           |
|----------------------------------------------|-------------|-----------------------------------------------------------|
|                                              | 278.00      | Obesity, unspecified                                      |
|                                              | 278.01      | Morbid obesity                                            |
|                                              | 278.02      | Overweight                                                |
|                                              | 278.03      | Obesity hypoventilation syndrome                          |
| ICD10                                        | E66.0-E66.9 | Overweight and obesity                                    |
| <b>Diabetes</b>                              |             |                                                           |
| ICD9                                         | 250.0-250.9 | Diabetes mellitus (Type 1 & 2)                            |
| ICD10                                        | E10.1-E10.9 | Type 1 diabetes mellitus                                  |
|                                              | E11.1-E11.9 | Type 2 diabetes mellitus                                  |
| <b>Coronary artery disease</b>               |             |                                                           |
| ICD9                                         | 414.0       | Coronary atherosclerosis                                  |
|                                              | 414.2       | Chronic total occlusion of coronary artery                |
|                                              | 414.3       | Coronary atherosclerosis due to lipid rich plaque         |
|                                              | 414.4       | Coronary atherosclerosis due to calcified coronary lesion |
|                                              | 414.8       | Other specified forms of chronic ischemic heart disease   |
|                                              | 414.9       | Chronic ischemic heart disease, unspecified               |
| ICD10                                        | I25.1       | Atherosclerotic heart disease of native coronary artery   |
|                                              | I25.8       | Other forms of chronic ischemic heart disease             |
|                                              | I25.9       | Chronic ischemic heart disease, unspecified               |
| <b>Heart failure</b>                         |             |                                                           |
| ICD9                                         | 428.0       | Congestive heart failure                                  |
|                                              | 428.1       | Left heart failure                                        |
|                                              | 428.2       | Systolic heart failure                                    |
|                                              | 428.3       | Diastolic heart failure                                   |
|                                              | 428.4       | Combined systolic and diastolic heart failure             |
|                                              | 428.9       | Heart failure, unspecified                                |
| ICD10                                        | I50.1       | Left ventricular failure, unspecified                     |
|                                              | I50.2       | Systolic (congestive) heart failure                       |
|                                              | I50.3       | Diastolic (congestive) heart failure                      |
|                                              |             | Combined systolic (congestive) and diastolic (congestive) |
|                                              | I50.4       | heart failure                                             |
|                                              | I50.8       | Other heart failure                                       |
|                                              | I50.9       | Heart failure, unspecified                                |
| <b>Myocardial infarction</b>                 |             |                                                           |
| ICD9                                         | 410.0-410.9 | Acute myocardial infarction                               |
| ICD10                                        | I21.0-I21.9 | Acute myocardial infarction                               |
|                                              | I21.A       | Other type of myocardial infarction                       |
|                                              |             | Myocardial infarction with coronary microvascular         |
|                                              | I21.B       | dysfunction                                               |
| <b>Chronic obstructive pulmonary disease</b> |             |                                                           |
|                                              | 493.20      | Chronic obstructive asthma, unspecified                   |
|                                              | 493.21      | Chronic obstructive asthma with status asthmaticus        |
|                                              | 493.22      | Chronic obstructive asthma with (acute) exacerbation      |
|                                              | 496         | Chronic airway obstruction, not elsewhere classified      |
| ICD10                                        | J44.0       | Chronic obstructive pulmonary disease with (acute) lower  |
|                                              |             | respiratory infection                                     |
|                                              | J44.1       | Chronic obstructive pulmonary disease with (acute)        |
|                                              |             | exacerbation                                              |
|                                              | J44.8       | Other specified chronic obstructive pulmonary disease     |
|                                              | J44.9       | Chronic obstructive pulmonary disease, unspecified        |
| <b>Chronic kidney disease</b>                |             |                                                           |
| ICD9                                         | 585.1-585.5 | Chronic kidney disease, Stage I-Stage V                   |
|                                              | 585.6       | End stage renal disease                                   |
|                                              | 585.9       | Chronic kidney disease, unspecified                       |
| ICD10                                        | N18.1-N18.5 | Chronic kidney disease, stage 1-Stage 5                   |

|                       |             |                                             |
|-----------------------|-------------|---------------------------------------------|
|                       | N18.6       | End stage renal disease                     |
|                       | N18.9       | Chronic kidney disease, unspecified         |
| Chronic liver disease |             |                                             |
| ICD9                  | 571.0-571.9 | Chronic liver disease and cirrhosis         |
| ICD10                 | K73.0-K73.9 | Chronic hepatitis, not elsewhere classified |
| Cancer                |             |                                             |
| ICD9                  | 140-239     | Neoplasms                                   |
| ICD10                 | C00-C96     | Neoplasms                                   |
|                       | D00-D49     | Neoplasms                                   |

Sources:

[43] Du, X. L., Song, L., Schulz, P. E., Xu, H., & Chan, W. (2022). Risk of Developing Alzheimer's Disease and Related Dementias in Association with Cardiovascular Disease, Stroke, Hypertension, and Diabetes in a Large Cohort of Women with Breast Cancer and with up to 26 Years of Follow-Up. *Journal of Alzheimer's disease: JAD*, 87(1), 415–432. <https://doi.org/10.3233/JAD-215657>
